# Supplementary material for: IPX203 vs Immediate-Release Carbidopa-Levodopa for the Treatment of Motor Fluctuations in Parkinson Disease: The RISE-PD Randomized Clinical Trial
Source: PubMed Central journal article supplement (PMC10425876; doi:10.1001/jamaneurol.2023.2679), 2023-08-14
Supplement: jamaneurol-e232679-s002.pdf [file jamaneurol-e232679-s002.pdf]

## Supplemental Online Content

Hauser RA, Espay AJ, Ellenbogen AL, et al. IPX203 vs immediate-release carbidopa-levodopa for the treatment of motor fluctuations in Parkinson disease: the RISE-PD randomized clinical trial. *JAMA Neurol*. Published online August 14, 2023. doi:10.1001/jamaneurol.2023.2679

**eTable 1.** Demographics and Study Entry Characteristics

**eTable 2.** Data Summary of Efficacy Endpoints

**eTable 3.** Levodopa Dosages and Dosing Frequencies in the Double-Blind Period, Randomized Analysis Set

**eFigure.** Change from Baseline in “Off” Time, mITT Analysis Set

This supplemental material has been provided by the authors to give readers additional information about their work.

**eTable 1. Demographics and Study Entry Characteristics**

| Demographic/characteristic          | Total<br>(n=630) | Not<br>randomized<br>(n=124) | IPX203<br>(n=256) | IR CD-LD<br>(n=250) |
|-------------------------------------|------------------|------------------------------|-------------------|---------------------|
| Age (y), mean (SD)                  | 66.5 (8.95)      | 67.3 (9)                     | 66.1 (9.02)       | 66.5 (8.85)         |
| Gender, males, n (%)                | 396 (62.9)       | 60 (48.4%)                   | 159 (62.1%)       | 177 (70.8%)         |
| Gender, females, n (%)              | 234 (37.1)       | 64 (51.6)                    | 97 (37.9)         | 73 (29.2)           |
| Age of onset of PD (y), mean (SD)   | 58 (9.42)        | 58 (9.72)                    | 57.7 (9.13)       | 58.3 (9.60)         |
| Hoehn and Yahr 2/3/4, %             | 90.5             | 90.3                         | 89.4              | 91.6                |
| Screening MoCA score, mean (SD)     | 27.1 (1.81)      | 26.8 (1.87)                  | 27.3 (1.80)       | 27.2 (1.78)         |
| MDS-UPDRS Part III (On), mean (SD)  | 24.7 (15.66)     | 24.1 (15.34)                 | 24.7 (15.96)      | 24.9 (15.56)        |
| MDS-UPDRS Part III (Off), mean (SD) | 45.2 (14.33)     | 43.4 (15.47)                 | 45.5 (13.96)      | 45.6 (14.11)        |
| “Off” Time (h), mean (SD)           | 6.13 (2.21)      | 6.24 (2.36)                  | 6.12 (2.16)       | 6.08 (2.18)         |
| “Good On” time (h), mean (SD)       | 9.56 (2.27)      | 9.55 (2.46)                  | 9.52 (2.21)       | 9.60 (2.34)         |
| Total daily LD, mean (SD)           | 797.8 (335.30)   | 836.9 (338.93)               | 792.3 (329.10)    | 784.1 (339.64)      |
| Total daily IR LD, mean (SD)        | 754.7 (322.87)   | 791.7 (321.01)               | 746 (320.82)      | 745.2 (325.84)      |

Abbreviations: PD, Parkinson's Disease; MoCA, MoCA, Montreal Cognitive Assessment; MDS-UPDRS, Movement Disorders Society-Unified Parkinson's Disease Rating Scale; LD, levodopa; IR CD-LD, immediate-release carbidopa-levodopa.

**eTable 2: Data Summary of Efficacy Endpoints**

| Endpoints                                                                                   | IPX203<br>(N=249) | IR CD-LD<br>(N=246) | Difference<br>(IPX203 vs. IR<br>CD-LD) | p value              |
|---------------------------------------------------------------------------------------------|-------------------|---------------------|----------------------------------------|----------------------|
| <b>Primary endpoint</b>                                                                     |                   |                     |                                        |                      |
| Change from baseline in<br>“Good on” time, LS mean                                          | -0.5              | -1.03               | 0.53                                   | 0.02 <sup>a</sup>    |
| <b>Key secondary endpoints</b>                                                              |                   |                     |                                        |                      |
| Change from baseline in<br>“Off” time, LS mean                                              | 0.38              | 0.86                | -0.48                                  | 0.03 <sup>a</sup>    |
| Patients self-rated “Much<br>Improved” or “Very Much<br>Improved” on PGI-C, % <sup>c</sup>  | 29.7              | 18.8                | 10.9                                   | 0.002 <sup>b</sup>   |
| Change from baseline in<br>MDS-UPDRS Part III score,<br>LS mean <sup>c</sup>                | 0.8               | 0.8                 | 0                                      | 0.96 <sup>a</sup>    |
| Change from baseline in<br>sum of MDS-UPDRS Part II<br>and III scores, LS mean <sup>c</sup> | 1.7               | 1.8                 | 0                                      | 0.97 <sup>a</sup>    |
| <b>Post-hoc analysis</b>                                                                    |                   |                     |                                        |                      |
| “Good on” time (h) per<br>dose, LS mean                                                     | 3.76              | 2.21                | 1.55                                   | <0.0001 <sup>a</sup> |

Abbreviations: IR CD-LD, immediate-release carbidopa-levodopa; LS, least square; MDS-UPDRS, Movement Disorders Society- Unified Parkinson’s Disease Rating Scale; PGI-C, Patient Global Impression of Change.

<sup>a</sup> p value for the hypothesis of equal LS means.

<sup>b</sup> p value from the Cochran-Mantel-Haenszel test stratified by pooled center comparing the proportion of much or very much improved patients between the treatment groups.

<sup>c</sup> IPX203, N=256; IR CD-LD, N=250.

**eTable 3: Levodopa Dosages and Dosing Frequencies in the Double-Blind Period, Randomized Analysis Set**

| <b>Characteristic<br/>Statistic</b>       | <b>IR CD-LD<br/>(N=250)</b> | <b>IPX203<br/>(N=256)</b> |
|-------------------------------------------|-----------------------------|---------------------------|
| <b>Total daily dose of LD (mg)</b>        |                             |                           |
| N                                         | 250                         | 256                       |
| Mean (SD)                                 | 856.94 (378.68)             | 1488.05 (592.78)          |
| Median (min, max)                         | 800 (400, 2100)             | 1400 (420, 3360)          |
| <b>Daily dosing frequency (times/day)</b> |                             |                           |
| N                                         | 250                         | 256                       |
| Mean (SD)                                 | 5.01 (1.19)                 | 3.04 (0.40)               |
| Median (min, max)                         | 5 (3, 10)                   | 3 (2, 4)                  |

Abbreviations: IR CD-LD, immediate-release carbidopa-levodopa; LD, levodopa.

eFigure 1: Change from Baseline in “Off” Time, mITT Analysis Set

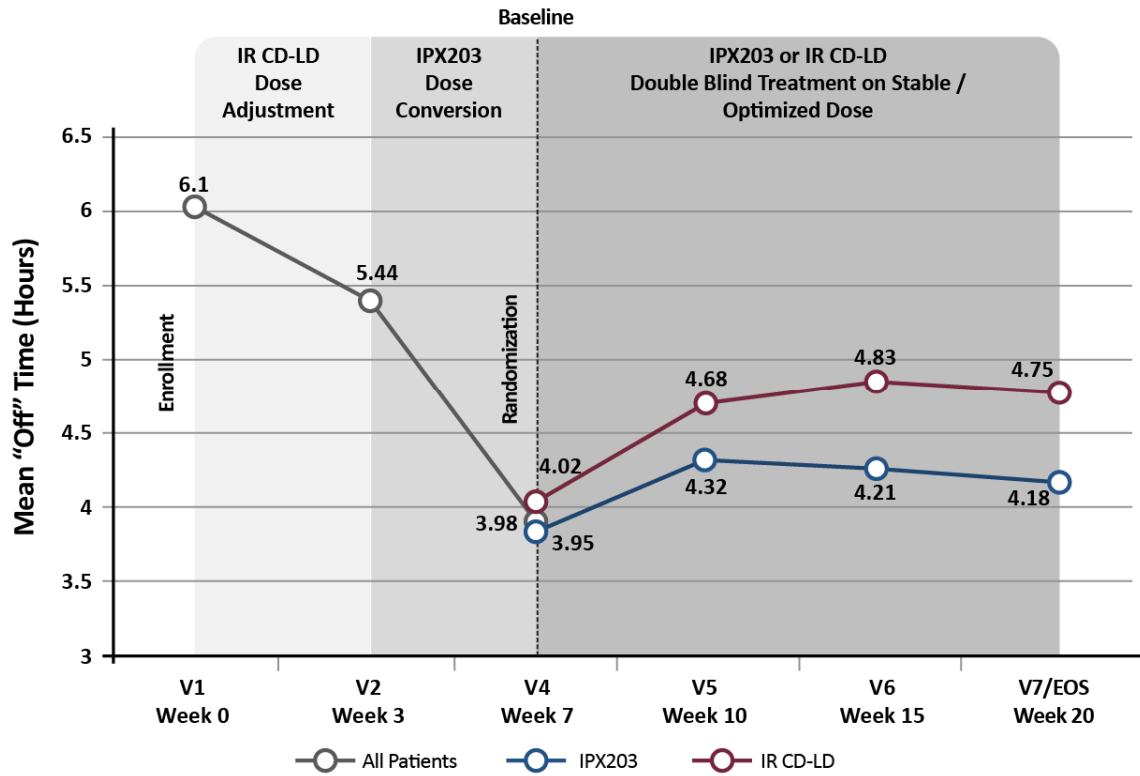

Abbreviations: EOS, end of study; IR CD-LD, immediate-release carbidopa-levodopa; mITT, modified intent-to-treat; V, Visit.
