# Supplementary material for: IPX203 vs Immediate-Release Carbidopa-Levodopa for the Treatment of Motor Fluctuations in Parkinson Disease: The RISE-PD Randomized Clinical Trial
Source: PubMed Central journal article supplement (PMC10425876; doi:10.1001/jamaneurol.2023.2679), 2023-08-14
Supplement: jamaneurol-e232679-s003.pdf [file jamaneurol-e232679-s003.pdf]

## Data Sharing Statement

Hauser. IPX203 vs Immediate-Release Carbidopa-Levodopa for the Treatment of Motor Fluctuations in Parkinson Disease. *JAMA Neurol*. Published August 14, 2023.

doi:10.1001/jamaneurol.2023.2679

### Data

**Data available:** Yes

**Data types:** Deidentified participant data

**How to access data:** Hester Visser <[Hester.Visser@amneal.com](mailto:Hester.Visser@amneal.com)>

**When available:** With publication

### Supporting Documents

**Document types:** None

### Additional Information

**Who can access the data:** researchers whose proposed use of the data has been approved

**Types of analyses:** for a specified purpose

**Mechanisms of data availability:** after request in writing to sponsor and after approval by sponsor
